1           **Association of polypharmacy and burden of comorbidities on COVID-19**  
2                           **adverse outcomes in people with type 1 or type 2 diabetes**

3   JK Gupta<sup>1</sup>, R Ravindrarajah<sup>1</sup>, George Tilston<sup>1</sup>, W Ollier<sup>2</sup>, DM Ashcroft<sup>3,4</sup>, AH Heald<sup>5,6</sup>

4   <sup>1</sup> Division of Informatics, Imaging and Data Science, Faculty of Biology, Medicine and Health,  
5   University of Manchester, Manchester, UK.

6   <sup>2</sup> Faculty of Science and Engineering, Manchester Metropolitan University, Manchester, UK

7   <sup>3</sup> Division of Pharmacy & Optometry, School of Health Sciences, Faculty of Biology, Medicine and  
8   Health, University of Manchester, Manchester, UK.

9   <sup>4</sup> NIHR Greater Manchester Patient Safety Research Collaboration (PSRC), University of Manchester,  
10   UK

11   <sup>5</sup> Department of Diabetes and Endocrinology, Salford Royal NHS Foundation Trust, Salford, UK

12   <sup>6</sup> Faculty of Biology, Medicine and Health, Manchester, UK

13

14   **RUNNING TITLE:** Polypharmacy and comorbidity impact on COVID-19 health outcome in diabetes

15

16   **Abstract**

17   Aim: To investigate whether polypharmacy and comorbidities conveyed more risk of adverse health  
18   outcomes following COVID-19 infection in people with type 1 diabetes (T1DM) or type 2 diabetes  
19   (T2DM).

20   Materials and methods: The Greater Manchester Care Record (GMCR) is an integrated database of  
21   electronic health records containing data collected from 433 general practices in Greater Manchester.  
22   Baseline demographic information (age, BMI, gender, ethnicity, smoking status, deprivation index),  
23   hospital admission or death within 28 days of infection were extracted for adults (18+) diagnosed with  
24   either T1DM or T2DM.

**NOTE: This preprint reports new research that has not been certified by peer review and should not be used to guide clinical practice.**

25 Results: For T2DM, 16 to 20 medications ( $p=0.01$ ; OR [95% CI]=2.37 [1.31 to 4.32]) and > 20  
26 medications ( $p=0$ ; OR [95% CI]=3.14 [1.75 to 5.62]) were associated with increased risk of death  
27 following COVID-19 infection. Increased risk of hospital admissions in T2DM individuals was  
28 determined for 11 to 15 medications ( $p=0.01$ ; OR [95% CI]=1.34 [1.06 to 1.69]) and above. This was  
29 independent of comorbidities, metabolic and demographic factors. For T1DM there was no  
30 association of polypharmacy with hospital admission. Respiratory, cardiovascular/cerebrovascular  
31 and gastrointestinal conditions were associated with increased risk of hospital admissions and deaths  
32 in T2DM ( $p>0.001$ ).

33 Conclusion: We have shown in T2DM an independent association of number of medications taken  
34 from 11 upwards with adverse health consequences following COVID-19 infection. We also found that  
35 individuals with diabetes develop comorbidities that were common across both T1DM and T2DM. This  
36 study has laid the foundation for future investigations into the way that complex pharmacological  
37 interactions may influence clinical outcomes in people with T2DM.

38

39 **Keywords:** polypharmacy; comorbidity; electronic health records; COVID-19

40

## 41 Introduction

42 Acute Respiratory Syndrome coronavirus 2 (SARS-CoV-2) or COVID-19 is the pathogenic coronavirus  
43 that led to the 2020 pandemic. COVID-19 infections can lead to adverse outcomes, such as hospital  
44 admission or death, the risk of which are increased further for individuals diagnosed with either type  
45 1 diabetes mellitus (T1DM) or type 2 diabetes mellitus (T2DM) <sup>1,2</sup>. Increased risk of adverse health  
46 outcomes following COVID-19 infection have also been linked to other underlying medical conditions,  
47 which has raised concerns for chronic disease care <sup>3-7</sup>. It has been showed that socially marginalised  
48 and psychiatrically vulnerable individuals are at higher risk of severe health outcomes following  
49 COVID-19 infection <sup>8</sup>. McQueenie et al. (2020) investigated the UK Biobank data to determine the  
50 association between multi-morbidity (including polypharmacy as a proxy) and COVID-19 infection risk

51 <sup>9</sup>. McQueenie et al. (2020) reported that individuals diagnosed with  $\geq 2$  cardiometabolic conditions and  
52 increasing polypharmacy were associated with increased the risk of COVID-19 infection <sup>9</sup>.  
53 Previous studies of COVID-19 in individuals with T1DM and T2DM (in the Greater Manchester (GM)  
54 area) have shown that the prescribing of certain medications influenced the likelihood of  
55 hospitalisation or death following COVID-19 infection <sup>10,11</sup>. Many individuals in this population are  
56 often prescribed, and are taking, multiple medications as they live with other long-term conditions.  
57 The definition of ‘polypharmacy’ has been shown to widely vary in the published literature <sup>12</sup>. In  
58 addition to this term, Masnoon et al. (2017) summarised that the terms minor, moderate and major  
59 polypharmacy were used in literature to describe when between 2 to 11 or more medications are  
60 consumed. The most commonly reported number of medications across these ‘polypharmacy’ terms  
61 was greater than or equal to 5, as identified in the review <sup>12</sup>.  
62 It is widely accepted that the higher the number of medications prescribed and taken by an individual,  
63 the higher the risk of poor health outcomes. Recent reviews have reported a high prevalence of  
64 polypharmacy in older people diagnosed with diabetes and an association with several health-related  
65 outcomes, including falls, syncope, hospitalization, and death, as well as highlighting the need to  
66 reduce inappropriate prescribing <sup>13–15</sup>. Several studies have also investigated the relationship between  
67 polypharmacy and severe COVID-19 health outcomes <sup>16,17</sup>. However, there is little understanding of  
68 how polypharmacy in people with diabetes might affect their risk of severe health outcome post  
69 COVID-19 infection, other than the public health burden and impact of adverse drug-drug interactions  
70 in individuals <sup>18</sup>.  
71 Electronic health records (EHR) emerged as a useful tool for public health and COVID-19 research, as  
72 described by Madhavan et al. (2021) and Casey et al. (2016) <sup>19,20</sup>. It is also useful for improving health  
73 service for example by identifying and understanding health inequalities <sup>21,22</sup>.  
74 To date, there are no studies that explore the associations between both polypharmacy and  
75 comorbidity with adverse health outcomes, such as hospital admission or death, post first infection of  
76 COVID-19 specifically in individuals with diabetes. This study aimed to investigate whether

77 polypharmacy and comorbidities conveys more risk of adverse outcomes in people with diabetes  
78 when testing positive for COVID-19 infection in UK EHR data.

79

## 80 **Materials and methods**

### 81 **Cohort data source**

82 The Greater Manchester Care Record (GMCR) is an integrated database of primary care, secondary  
83 care and mental health trusts from across GM ([https://gmwearebettertogether.com/research-and-](https://gmwearebettertogether.com/research-and-planning/)  
84 [planning/](https://gmwearebettertogether.com/research-and-planning/)) for retrospective analyses covering a population of approximately 3 million people. Health  
85 and care data were collected from 433 of 435 (99.5%) general practices in GM. Data were de-identified  
86 at source and were extracted from the GMCR database. The inclusion criteria for this study were  
87 defined as individuals that are registered with a GM GP practice and with a diagnosis of T1DM or T2DM  
88 and age 18 or above. Individuals with a positive test for COVID-19 close to January 2020 were included  
89 in this study. **Variables and data cleaning**

90 Baseline demographic information (age, BMI, gender, ethnicity, smoking status, deprivation index),  
91 hospital admission or death within 28 days of infection were extracted for adults (18+) diagnosed with  
92 either T1DM or T2DM (the codes applied are summarised in Appendix 1). Other rare forms of diabetes  
93 were not included.

94 Hospital admissions were recorded within 4 weeks after, or 2 weeks before a positive COVID-19 test  
95 (between Jan 2020 to May 2022). The exposure was defined as prescribed medications, which were  
96 recorded in the EHRs and mapped to the corresponding BNF (British National Formulary) chapters.  
97 For this study, medications were considered at a single point in time, the month closest to first COVID-  
98 19 infection date (January 2020 onwards). The BNF groups were not mutually exclusive, therefore  
99 medications that are grouped under more than one chapter were counted. History of comorbidity was  
100 collected before March 2020.

101 Individuals who were not assigned a gender were excluded. A total of 410 individuals having a code  
102 for both T1DM and T2DM were excluded. Data were checked for extreme outliers or inconsistent  
103 values and removed as appropriate.

#### 104 **Ethics**

105 This project was reviewed, and ethical approval for COVID-19 research was overseen by Health  
106 Innovation Manchester and granted by the Greater Manchester Care Record (GMCR) review board  
107 (ref: IDCR-RQ-046). This research was performed with anonymised data, in line with the Health  
108 Research Authority's Governance arrangements for research ethics committees.

#### 109 **Statistical methods**

110 Multivariable logistic regression analyses were performed on the T1DM and T2DM individuals,  
111 measuring exposure to number of medications and comorbidities, with either hospital admission or  
112 death after COVID-19 infection (within 28 days of COVID-19 diagnosis) as the outcome. The models  
113 were adjusted for age, BMI, ethnicity, smoking status, IMD, eGFR < 60, cholesterol, HBA1C and blood  
114 pressure. Analyses were performed in STATA v17.

115 This manuscript follows the reporting recommendation of RECORD-PE <sup>23</sup>.

116

## 117 **Results**

118 The study cohort included patients diagnosed as T1DM and T2DM separately. Across the Greater  
119 Manchester Region a total of 145,907 individuals were diagnosed with T2DM and 9,705 were  
120 diagnosed with T1DM (Table 1; Table 2). The number of deaths in T1DM were too low (n=30) for  
121 further statistical analyses to explore the association with mortality.

122

123 **Table 1. Baseline demographics of individual diagnosed with Type 1 diabetes (T1DM) or Type 2**  
124 **diabetes (T2DM).**

|                          | Type 1 Diabetes | Type 2 Diabetes  |
|--------------------------|-----------------|------------------|
|                          | <i>N=9,705</i>  | <i>N=145,907</i> |
| Age (years)              | 47.3±16.8       | 65.8±13.8        |
| BMI (kg/m <sup>2</sup> ) | 27.7±7.0        | 31.0±7.7         |

|                                                                                 |              |               |
|---------------------------------------------------------------------------------|--------------|---------------|
| <b>Gender:</b>                                                                  |              |               |
| Female                                                                          | 4143 (42.7)  | 65922 (45.2)  |
| Male                                                                            | 5562 (57.3)  | 79985 (54.8)  |
| <b>Smoking status:</b>                                                          |              |               |
| Non-smoker                                                                      | 3967 (40.9)  | 51823 (35.5)  |
| Current smoker                                                                  | 1804 (18.6)  | 20906 (14.3)  |
| Ex-smoker                                                                       | 3765 (38.8)  | 71519 (49.0)  |
| Unknown/missing                                                                 | 169 (1.7)    | 1659 (1.1)    |
| <b>Ethnicity:</b>                                                               |              |               |
| White                                                                           | 8020 (82.6)  | 102051 (69.9) |
| Asian                                                                           | 565 (5.8)    | 25359 (17.4)  |
| Black                                                                           | 221 (2.3)    | 5176 (3.6)    |
| Mixed                                                                           | 107 (1.1)    | 1528 (1.1)    |
| Other                                                                           | 379 (3.9)    | 6184 (4.2)    |
| Missing/refused                                                                 | 413 (4.3)    | 5609 (3.8)    |
| <b>Deprivation index/Townsend quintile (IMD)</b>                                |              |               |
| 1 (least deprived)                                                              | 1182 (12.2)  | 13471 (9.2)   |
| 2                                                                               | 1451 (15.0)  | 19080 (13.1)  |
| 3                                                                               | 1395 (14.4)  | 18017 (12.4)  |
| 4                                                                               | 1984 (20.4)  | 28863 (19.8)  |
| 5 (most deprived)                                                               | 3680 (37.9)  | 66426 (45.5)  |
| Missing                                                                         | 13 (0.1)     | 50 (0.03)     |
| <b>Total number of medications prescribed*</b>                                  |              |               |
| 0                                                                               | 543 (5.60)   | 13359 (9.16)  |
| 1 to 5                                                                          | 5822 (59.99) | 51999 (35.64) |
| 6 to 10                                                                         | 1879 (19.36) | 38533 (26.41) |
| 11 to 15                                                                        | 744 (7.67)   | 21433 (14.69) |
| 16 to 20                                                                        | 348 (3.59)   | 9880 (6.77)   |
| > 20                                                                            | 369 (3.80)   | 10703 (7.34)  |
| <b>Systolic blood pressure (mm Hg) †</b>                                        | 127.1±15.2   | 131.1±14.5    |
| <b>Diastolic blood pressure (mm Hg) †</b>                                       | 74.8±9.8     | 75.9±9.6      |
| <b>HBA1C (mmol/mol) †</b>                                                       | 69.3±20.3    | 56.8±17.0     |
| <b>eGFR (mL/min/1.73 m<sup>2</sup>) &lt; 60 ‡</b>                               | 907 (9.4)    | 25851 (17.7)  |
| eGFR (mL/min/1.73 m <sup>2</sup> ) †                                            | 81.0±15.5    | 75.4±17.2     |
| <b>Cholesterol (mmol/mol) †</b>                                                 | 4.5±1.1      | 4.3±1.1       |
| LDL (mmol/L) †                                                                  | 2.4±0.9      | 2.2±0.9       |
| HDL (mmol/L) †                                                                  | 1.5±0.5      | 1.2±0.4       |
| Diabetes duration (years)                                                       | 20.6±14.3    | 10.4±7.45     |
| <b>Vaccination status: (define prior to/around the time of first infection)</b> |              |               |
| Yes                                                                             | 8816 (90.8)  | 135141 (92.6) |
| No                                                                              | 889 (9.2)    | 10766 (7.4)   |
| <b>Prescribed medications: *</b>                                                |              |               |
| Metformin                                                                       | 1015 (10.5)  | 72084 (49.4)  |
| SGLT2 *                                                                         | 163 (1.7)    | 16134 (11.1)  |
| Insulin                                                                         | 6854 (70.6)  | 12149 (8.3)   |
| Arb/ACE inhibitors                                                              | 1759 (18.1)  | 44127 (30.2)  |
| Antiplatelet (clopidogrel/aspirin)                                              | 1177 (12.1)  | 31403 (21.5)  |
| Angiotensin receptor blockers                                                   | 710 (7.3)    | 20168 (13.8)  |
| Sulphonylureas                                                                  | 98 (1.0)     | 22011 (15.1)  |

|                                                            |          |             |
|------------------------------------------------------------|----------|-------------|
| GLP1 receptor agonists                                     | 79 (0.8) | 4475 (3.1)  |
| Alogliptin                                                 | 36 (0.4) | 10196 (7.0) |
| Linagliptin                                                | 37 (0.4) | 5388 (3.7)  |
| Saxagliptin                                                | < 10 (0) | 944 (0.7)   |
| Sitagliptin                                                | 29 (0.3) | 6570 (4.5)  |
| Vildagliptin                                               | < 10 (0) | 396 (0.27)  |
| <b>Admission to hospital (within 28 days of infection)</b> | 146(1.5) | 2107 (1.4)  |
| Length of stay in hospital (days)                          | 4.5±8.3  | 7.1±11.9    |
| <b>Deaths (within 28 days of confirmed infection)</b>      | 30 (0.3) | 885 (0.6)   |

125 Categorical variables presented as N (%) and continuous variables as mean (±SD)

126 Townsend index: 1 denotes the least deprived and 5 the most deprived.

127 \* Medications prescribed close to January 2020.

128 † Closest point before first COVID-19 +ve test

129 ‡ Estimated glomerular filtration rate

130 \* Sodium glucose co-transporter 2 inhibitor (SGLT2i) or a glucagon-like peptide 1 (GLP-1) agonist.

131

132 A varying number of multiple medications were prescribed to individuals with T1DM or T2DM (Table  
133 1). A large proportion of individuals were prescribed between 1 to 5 medications; the distribution of  
134 number of medications prescribed and BNF chapters can be seen in Figure S1 and Figure S2. In T2DM,  
135 after endocrine and cardiovascular medications, the largest number of multiple prescriptions were  
136 from the gastrointestinal (GI) BNF chapter.

137 Common comorbidities were grouped into broader categories (see Supplementary Information Table  
138 S1) and counts were collated for T1DM and T2DM. The top six modal comorbidity groups identified in  
139 T2DM were mental health conditions, hypertension, gastrointestinal or liver disease, pain, respiratory  
140 conditions (or sinus-related) and cardiovascular/cerebrovascular conditions (Table 2). Of the  
141 individuals diagnosed with T2DM, 69.9% were diagnosed with hypertension and 44.9% with mental  
142 health conditions (Table 2). The same six comorbidity groups were also identified in the individuals  
143 with T1DM (Table S2).

144

145 **Table 2. Prevalence of co-morbidity groups in individuals diagnosed with T2DM. The top 6 groups**  
146 **are shown in italics.**

| <b>Morbidity group</b>                | <b>N</b> | <b>%</b> |
|---------------------------------------|----------|----------|
| <i>Hypertension</i>                   | 101995   | 69.9     |
| <i>GI/liver disease</i>               | 82193    | 56.3     |
| <i>Mental health disorder</i>         | 65487    | 44.9     |
| <i>Pain</i>                           | 60237    | 41.3     |
| <i>Cardiovascular/cerebrovascular</i> | 48213    | 33.0     |

|                                 |       |      |
|---------------------------------|-------|------|
| <i>Respiratory/sinus</i>        | 41653 | 28.6 |
| Sensory                         | 34541 | 23.7 |
| Skin/connective tissue disorder | 28459 | 19.5 |
| Chronic kidney disease          | 27931 | 19.1 |
| Neurological disorders          | 22795 | 15.6 |
| Thyroid disorders               | 14476 | 9.9  |
| Prostate diseases               | 9276  | 6.4  |
| Alcohol substance abuse         | 9108  | 6.2  |
| Cancer                          | 7892  | 5.4  |
| Dementia                        | 6498  | 4.5  |
| Glaucoma                        | 6262  | 4.3  |
| Learning disability             | 1016  | 0.7  |

147

### 148 **Logistic Regression Analysis**

149 Odds ratios (95% confidence intervals) of the univariate regression are reported in the individuals with  
150 T1DM and T2DM respectively.

#### 151 **T1DM**

152 An increased risk of adverse outcomes post-infection was observed for individuals with T1DM and  
153 GI/liver disorders ( $p=0$ ; 3.45 [2.12 to 5.62]) and pain associated conditions ( $p=0.04$ ; OR [95% CI] = 1.56  
154 [1.02 to 2.37]) (Table 3). Age was significant. Other significant variables included eGFR < 60 ( $p=0$ ; OR  
155 [95% CI] = 2.79 [1.75 to 4.47]). There was no association with polypharmacy.

156

157 **Table 3. Logistic regression analyses of hospital admission resulting from COVID-19 infection in**  
158 **individuals with T1DM.**

| Variable              | OR (95% CI)         | p value |
|-----------------------|---------------------|---------|
| Age                   | 0.96 (0.95 to 0.98) | > 0.001 |
| <b>Gender</b>         |                     |         |
| Females               |                     |         |
| Males                 | 0.79 (0.54 to 1.17) | 0.24    |
| BMI                   | 0.99 (0.96 to 1.02) | 0.49    |
| <b>Ethnicity</b>      |                     |         |
| White                 |                     |         |
| Asian                 | 0.92 (0.43 to 1.96) | 0.83    |
| Black                 | 0.39 (0.05 to 2.88) | 0.36    |
| Mixed                 | 1.89 (0.44 to 8.04) | 0.39    |
| Other                 | 0.45 (0.11 to 1.85) | 0.27    |
| Unknown               | 0.25 (0.03 to 1.81) | 0.17    |
| <b>Smoking status</b> |                     |         |
| Non-smoker            |                     |         |
| Current smoker        | 0.86 (0.49 to 1.51) | 0.59    |
| Ex-smoker             | 1.02 (0.66 to 1.57) | 0.92    |
| Unknown/missing       | 1.24 (0.29 to 5.36) | 0.78    |



|                                     |                      |         |
|-------------------------------------|----------------------|---------|
| <b>IMD</b>                          |                      |         |
| 1 (least deprived)                  |                      |         |
| 2                                   | 0.86 (0.4 to 1.85)   | 0.71    |
| 3                                   | 0.65 (0.29 to 1.45)  | 0.29    |
| 4                                   | 1 (0.5 to 1.99)      | 1       |
| 5 (most deprived)                   | 0.84 (0.44 to 1.61)  | 0.60    |
| Missing                             |                      |         |
| eGFR<60                             | 2.79 (1.75 to 4.47)  | > 0.001 |
| Cholesterol                         | 0.92 (0.78 to 1.1)   | 0.37    |
| HBA1C                               | 1 (0.99 to 1.01)     | 0.68    |
| Systolic BP                         | 1 (0.98 to 1.01)     | 0.79    |
| Diastolic BP                        | 1.02 (1 to 1.04)     | 0.11    |
| Mental health disorder              | 0.69 (0.46 to 1.03)  | 0.07    |
| Hypertension                        | 1.18 (0.75 to 1.86)  | 0.48    |
| GI/liver disorder                   | 3.45 (2.12 to 5.62)  | > 0.001 |
| Pain                                | 1.56 (1.02 to 2.37)  | 0.04    |
| Respiratory/sinus conditions        | 0.99 (0.65 to 1.5)   | 0.95    |
| Cardiovascular/cerebrovascular      | 1.33 (0.81 to 2.16)  | 0.26    |
| <b>Total number of medications:</b> |                      |         |
| 0                                   |                      |         |
| 1 to 5                              | 1 (0.23 to 4.27)     | 1       |
| 6 to 10                             | 2.14 (0.49 to 9.38)  | 0.31    |
| 11 to 15                            | 2.5 (0.54 to 11.55)  | 0.24    |
| 16 to 20                            | 3.58 (0.74 to 17.33) | 0.11    |
| > 20                                | 2.16 (0.42 to 10.99) | 0.36    |

159

## 160 T2DM

161 In individuals with T2DM, an increased number of medications, from 11 upwards was associated with  
 162 increased risk of hospital admission following COVID-19 infection (Table 4). Individuals diagnosed with  
 163 co-morbidities in the following morbidity groups had an increased likelihood of hospital admission:  
 164 mental health disorders (p=0; OR [95% CI] = 1.17 (1.05 to 1.29)); Gastro-intestinal/liver disorders (p=0;  
 165 OR [95% CI] = 1.98 (1.74 to 2.25)); pain (p=0; OR [95% CI] = 1.41 (1.27 to 1.56)); respiratory/sinus  
 166 conditions (p=0; OR [95% CI] = 1.24 (1.11 to 1.37)) and cardiovascular/cerebrovascular conditions  
 167 p=0; OR [95% CI] = 1.44 (1.29 to 1.61)). People with T2DM and eGFR level <60 (p= 0; OR [95% CI] =  
 168 1.43 [1.27 to 1.61]) also had an increased risk of hospital admission, similarly HBA1C levels (p= 0.01;  
 169 OR [95% CI] = 1 [1 to 1.01]) were also at increased risk (Table 4).

170 Males were more likely to be admitted to hospital after infection with COVID-19 (p=0; OR [95% CI] =  
 171 1.31 [1.18 to 1.46]). Extremes of BMI (too high or too low) was associated with a higher likelihood of  
 172 adverse outcomes (hospitalisation & mortality) from COVID-19 (p=0; OR [95% CI] = 1.01 [1 to 1.02]).  
 173 Age was protective of hospital admission; however the odds ratio was only slightly less than 1 (p=0.01;

174 OR [95% CI] = 0.99 [0.99 to 1]). Individuals of Asian (p=0.01; OR [95% CI] = 1.21 [1.06 to 1.39]) or Black  
175 (p=0; OR [95% CI] = 1.44 [1.13 to 1.84]) ethnicities were also more likely to be admitted to hospital  
176 following infection (Table 4).

177 Individuals who identified as ‘current smokers’ were not identified as being at increased risk (p=0; OR  
178 [95% CI] = 0.51 [0.42 to 0.61]). However, individuals who lived in more deprived regions were  
179 statistically significant IMD 4 and 5 (p=0.02; OR [95% CI] = 1.28 [1.04 to 1.57]; p=0.03; OR [95% CI] =  
180 1.24 [1.02 to 1.5]) (Table 4).

181

182 **Table 4. Logistic regression analyses of hospital admission resulting from COVID-19 infection in**  
183 **individuals with T2DM.**

| Variable                     | OR (95% CI)         | p value |
|------------------------------|---------------------|---------|
| Age                          | 0.99 (0.99 to 1)    | 0.01    |
| <b>Gender</b>                |                     |         |
| Females                      |                     |         |
| Males                        | 1.31 (1.18 to 1.46) | > 0.001 |
| BMI                          | 1.01 (1 to 1.02)    | > 0.001 |
| <b>Ethnicity</b>             |                     |         |
| White                        |                     |         |
| Asian                        | 1.21 (1.06 to 1.39) | 0.01    |
| Black                        | 1.44 (1.13 to 1.84) | > 0.001 |
| Mixed                        | 1.06 (0.63 to 1.77) | 0.83    |
| Other                        | 0.96 (0.74 to 1.24) | 0.75    |
| Unknown                      | 0.95 (0.7 to 1.28)  | 0.73    |
| <b>Smoking status</b>        |                     |         |
| Non-smoker                   |                     |         |
| Current smoker               | 0.51 (0.42 to 0.61) | > 0.001 |
| Ex- smoker                   | 1 (0.89 to 1.12)    | 0.98    |
| Unknown/missing              | 0.86 (0.53 to 1.4)  | 0.53    |
| <b>IMD</b>                   |                     |         |
| 1 (least deprived)           |                     |         |
| 2                            | 1.07 (0.85 to 1.34) | 0.56    |
| 3                            | 1.09 (0.87 to 1.37) | 0.45    |
| 4                            | 1.28 (1.04 to 1.57) | 0.02    |
| 5 (most deprived)            | 1.24 (1.02 to 1.5)  | 0.03    |
| Missing                      |                     |         |
| eGFR<60                      | 1.43 (1.27 to 1.61) | > 0.001 |
| Cholesterol                  | 1.02 (0.98 to 1.07) | 0.37    |
| HBA1C                        | 1 (1 to 1.01)       | 0.01    |
| Systolic BP                  | 1 (1 to 1)          | 0.71    |
| Diastolic BP                 | 1 (1 to 1.01)       | 0.47    |
| Mental health disorder       | 1.17 (1.05 to 1.29) | > 0.001 |
| Hypertension                 | 1.07 (0.95 to 1.22) | 0.27    |
| GI/liver disorder            | 1.98 (1.74 to 2.25) | > 0.001 |
| Pain                         | 1.41 (1.27 to 1.56) | > 0.001 |
| Respiratory/sinus conditions | 1.24 (1.11 to 1.37) | > 0.001 |

|                                     |                     |         |
|-------------------------------------|---------------------|---------|
| Cardiovascular/cerebrovascular      | 1.44 (1.29 to 1.61) | > 0.001 |
| <b>Total number of medications:</b> |                     |         |
| 0                                   |                     |         |
| 1 to 5                              | 1.12 (0.9 to 1.4)   | 0.3     |
| 6 to 10                             | 1.11 (0.89 to 1.39) | 0.37    |
| 11 to 15                            | 1.34 (1.06 to 1.69) | 0.01    |
| 16 to 20                            | 1.45 (1.12 to 1.87) | > 0.001 |
| > 20                                | 1.53 (1.19 to 1.97) | > 0.001 |

184

185 In individuals with T2DM, the number of deaths was 885 (0.6% of the total number of individuals  
186 diagnosed with T2DM) (Table 1). An increased number of medications, from 16 to 20 to > 20 was  
187 associated with increased risk of death following COVID-19 infection (p=0.01; OR [95% CI] = 2.37 [1.31  
188 to 4.32] and p=0; OR [95% CI] = 3.14 [1.75 to 5.62] respectively) (Table 5).

189 People diagnosed with the following long-term conditions were at higher risk of death post-infection:  
190 mental health disorders (p=0; OR [95% CI] = 1.54 (1.22 to 1.95)); respiratory/sinus conditions (p=0; OR  
191 [95% CI] = 1.57 [1.24 to 1.99]) or cardiovascular/cerebrovascular conditions (p=0; OR [95% CI] = 1.69  
192 [1.3 to 2.2]). A protective effect was observed for individuals living with GI/liver disorder (p=0; OR  
193 [95% CI] = 0.52 (0.4 to 0.67)) or pain (p=0; OR [95% CI] = 0.51 [0.4 to 0.66]) (Table 5).

194 As with hospital admission, the risk of death in males and with increased BMI was high (p=0.02; OR  
195 [95% CI] = 1.35 [1.05 to 1.73] and p=0; OR [95% CI] = 1.02 [1.01 to 1.04] respectively). Age was  
196 associated with an increased risk of mortality post COVID-19 infection (p=0; OR [95% CI] = 1.09 [1.08  
197 to 1.11]) (Table 5).

198 Individuals with T2DM and living in the most deprived regions (IMD 5) were at higher risk of death  
199 following COVID-19 infection (p=0.02; OR [95% CI] = 1.68 [1.08 to 2.62]) or if their eGFR level measure  
200 was <60 (p=0.01; OR [95% CI] = 1.38 [1.08 to 1.77]) (Table 5).

201

202 **Table 5. Logistic regression analyses of deaths resulting from COVID-19 infection in individuals**  
203 **with T2DM.**

| Variable      | OR (95% CI)         | p value |
|---------------|---------------------|---------|
| Age           | 1.09 (1.08 to 1.11) | > 0.001 |
| <b>Gender</b> |                     |         |
| Females       |                     |         |
| Males         | 1.35 (1.05 to 1.73) | 0.02    |
| BMI           | 1.02 (1.01 to 1.04) | > 0.001 |

|                                     |                     |         |
|-------------------------------------|---------------------|---------|
| <b>Ethnicity</b>                    |                     |         |
| White                               |                     |         |
| Asian                               | 0.72 (0.46 to 1.12) | 0.15    |
| Black                               | 0.67 (0.27 to 1.63) | 0.37    |
| Mixed                               | 1.42 (0.45 to 4.5)  | 0.55    |
| Other                               | 0.7 (0.36 to 1.36)  | 0.29    |
| Unknown                             | 1.26 (0.72 to 2.21) | 0.42    |
| <b>Smoking status</b>               |                     |         |
| Non-smoker                          |                     |         |
| Current smoker                      | 1.02 (0.67 to 1.55) | 0.95    |
| Ex- smoker                          | 0.94 (0.72 to 1.23) | 0.68    |
| Unknown/missing                     |                     |         |
| <b>IMD</b>                          |                     |         |
| 1 (least deprived)                  |                     |         |
| 2                                   | 1.44 (0.88 to 2.37) | 0.15    |
| 3                                   | 1.18 (0.7 to 1.99)  | 0.53    |
| 4                                   | 1.48 (0.92 to 2.38) | 0.11    |
| 5 (most deprived)                   | 1.68 (1.08 to 2.62) | 0.02    |
| Missing                             |                     |         |
| eGFR<60                             | 1.38 (1.08 to 1.77) | 0.01    |
| Cholesterol                         | 1.08 (0.97 to 1.21) | 0.15    |
| HBA1C                               | 1 (0.99 to 1.01)    | 0.97    |
| Systolic BP                         | 0.99 (0.98 to 1)    | 0.12    |
| Diastolic BP                        | 1 (0.99 to 1.01)    | 0.91    |
| Mental health disorder              | 1.54 (1.22 to 1.95) | > 0.001 |
| Hypertension                        | 0.79 (0.57 to 1.1)  | 0.16    |
| GI/liver disorder                   | 0.52 (0.4 to 0.67)  | > 0.001 |
| Pain                                | 0.51 (0.4 to 0.66)  | > 0.001 |
| Respiratory/sinus conditions        | 1.57 (1.24 to 1.99) | > 0.001 |
| Cardiovascular/cerebrovascular      | 1.69 (1.3 to 2.2)   | > 0.001 |
| <b>Total number of medications:</b> |                     |         |
| 0                                   |                     |         |
| 1 to 5                              | 0.58 (0.32 to 1.06) | 0.08    |
| 6 to 10                             | 0.94 (0.54 to 1.67) | 0.84    |
| 11 to 15                            | 1.43 (0.8 to 2.55)  | 0.23    |
| 16 to 20                            | 2.37 (1.31 to 4.32) | 0.01    |
| > 20                                | 3.14 (1.75 to 5.62) | > 0.001 |

204

## 205 Discussion

206 We found that the number of medications prescribed to an individual was associated with an  
 207 increased risk of severe outcome from COVID-19 infection, particularly in people living with T2DM  
 208 (Table 4; Table 5). Given the large proportion of individuals diagnosed with comorbidities, it was not  
 209 unexpected that many of these individuals were prescribed multiple medications (Figure S1; Figure  
 210 S2). However, the effect of multiple medications was independent of the presence of the most  
 211 common comorbidities. This study uniquely explored the relationship between number of  
 212 medications and adverse outcome from COVID-19 infection in individuals diagnosed with diabetes in

213 the Greater Manchester population and is therefore distinct from our previous published studies in  
214 this area <sup>10,11</sup>. We saw that polypharmacy, independent of other factors including major  
215 multimorbidity, was associated with an increased likelihood of hospital admission in people with  
216 T1DM and of hospitalisation and death in T2DM following COVID-19 infection. This has not been  
217 specifically reported previously, although it was described in older individuals <sup>24</sup>. This is of relevance  
218 to the consequences following any serious viral infection in people with diabetes, while also  
219 highlighting the importance of regular medicine reviews in everyone with diabetes, where there may  
220 be an opportunity to reduce the prescribed medications <sup>25</sup>.

221 The mean ages of individuals diagnosed with T1DM or T2DM are similar to the mean ages of a Swedish  
222 cohort investigated by <sup>1</sup>. In our study we also identified several co-morbidities that increased the risk  
223 of adverse health outcome post COVID-19 infection. Similar co-morbidities were identified for both  
224 individuals with T1DM and T2DM. The increase in medications could be related to the co-morbidities  
225 that these individuals are diagnosed with and receiving medications for. The impact of this on an  
226 individual's risk of suffering from severe health outcome post COVID-19 infection warrants further  
227 investigation. Notably, we also identified that there were a large proportion of diagnoses of mental  
228 health conditions in people with T2DM (Table 2), though the highest number of diagnoses was  
229 observed in people with T1DM (Table S2). The relationship between physical health conditions and  
230 poor mental health is an area that is not fully understood, in addition to this, the impact of  
231 polypharmacy is unknown.

232 Over-prescribing is an issue in the current healthcare system. Medication is routinely recorded,  
233 therefore in clinical practice there is the potential to flag the number of medications prescribed to  
234 clinicians to monitor. Thereby the number of prescriptions given to vulnerable individuals could be  
235 limited as appropriate and effective for the individual, though this does require both routine  
236 monitoring and structured reviews of the medications that people are taking. The UK healthcare  
237 system looks to improve the management of prescriptions, and the removal of unnecessary  
238 medications is key to reducing the burden of polypharmacy <sup>26,27</sup>.

239 One of the limitations of this study is that a measure of 'frailty' was not included<sup>28</sup>. However, a count  
240 of comorbidities is included which could possibly be used as a proxy for frailty. As the data from this  
241 study originated from electronic health records, it is also subject to the limitations of how information  
242 is coded when originally entered into the systems, such as missing data. Only 70% of individuals with  
243 T1DM were recorded with a prescription of insulin (Table 1), this could be due to lack of recording or  
244 unclear diagnosis, which highlights another issue with routinely collected data. Another issue is that  
245 medications are recorded in the health care records are not true reflections of medications that are  
246 concordant with the choices of the individual<sup>29</sup>. A study in America demonstrated that EHR-related  
247 medication errors can occur at different stages including at ordering, preparation, dispensing,  
248 administering or monitoring stage, these can ultimately affect the data in EHRs<sup>30</sup>. Inaccuracies of  
249 coding are inherent in any project that relies on primary coded data. Nevertheless, the large number  
250 of people included in the study means that such inaccuracies are unlikely materially to influence the  
251 results. Furthermore, medications can also be counted in more than one BNF chapter, making it  
252 difficult to determine unique counts. As this data was from one region in the UK, it is difficult to  
253 generalise to the rest of the population.

254 Future work would include investigating the modal medications prescribed in this cohort and explore  
255 possible drug-drug interactions between medications that could contribute to increasing the risk of  
256 adverse outcome post COVID-19 infection. The burden of mental health conditions on people with  
257 diabetes and how to effectively manage multiple long-term conditions, could also be explored. The  
258 knowledge gained would be useful for future pandemics and better prepare our healthcare system.

259 In conclusion, we have identified that multiple medications were prescribed to many people living  
260 with diabetes and that this was associated with a higher risk of adverse health outcome following  
261 COVID-19 infection. We also found that individuals with diabetes also developed comorbidities that  
262 were common across both Type 1 and 2 diabetes. Our analysis confirmed the impact of higher levels  
263 of deprivation on increasing a person's a risk of adverse outcome post COVID-19 infection. This study

264 has laid the foundation for future investigations into the increased and complex treatments people  
265 living with diabetes who develop other clinical complications.

266

## 267 Acknowledgements

268 This work was supported by the Turing-Manchester Feasibility Project Funding. The authors recognise  
269 the Greater Manchester Care Record (a partnership of Greater Manchester Health and Social Care  
270 Partnership, Health Innovation Manchester and Graphnet Health, on behalf of Greater Manchester  
271 localities) in the provision of data required to undertake this work. This work uses data provided by  
272 patients and collected by the NHS as part of their care and support. GT was funded by the NIHR  
273 Manchester Biomedical Research Centre (NIHR203308) for this work. DMA is supported by the NIHR  
274 Greater Manchester Patient Safety Research Collaboration (PSRC). The views expressed are those of  
275 the authors and not necessarily those of the NIHR or the Department of Health and Social Care.

## 276 Author contributions

277 RR performed the data cleaning and data analyses. JG, WO and AHH conceived the study. JG prepared  
278 the figures and the manuscript. GT extracted the original dataset. DM WO and AHH contributed to all  
279 sections of the paper and DM provided expert input from a pharmacological perspective. All authors  
280 were involved in designing the study, interpreting results and the reviewing and editing of the  
281 manuscript.

## 282 Conflicts of interest

283 Authors declare no conflict of interest.

## 284 Data availability statement

285 The datasets generated during and analysed during the current study are not publicly available as all  
286 data access is subject to review by Health Innovation Manchester.

## 287 References

- 288 1. Rawshani A, Kjölhede EA, Rawshani A, et al. Severe COVID-19 in people with type 1 and type 2  
289 diabetes in Sweden: A nationwide retrospective cohort study. *The Lancet Regional Health -*  
290 *Europe*. 2021;4:100105. doi:10.1016/j.lanepe.2021.100105
- 291 2. Izzi-Engbeaya C, Distaso W, Amin A, et al. Adverse outcomes in COVID-19 and diabetes: a  
292 retrospective cohort study from three London teaching hospitals. *BMJ Open Diabetes Res Care*.  
293 2021;9(1):e001858. doi:10.1136/bmjdr-2020-001858
- 294 3. Kone AP, Martin L, Scharf D, et al. The impact of multimorbidity on severe COVID-19 outcomes  
295 in community and congregate settings. *Dialogues in Health*. 2023;2:100128.  
296 doi:10.1016/j.dialog.2023.100128
- 297 4. Li Y, Ashcroft T, Chung A, et al. Risk factors for poor outcomes in hospitalised COVID-19 patients:  
298 A systematic review and meta-analysis. *J Glob Health*. 11:10001. doi:10.7189/jogh.11.10001
- 299 5. Fekadu G, Bekele F, Tolossa T, et al. Impact of COVID-19 pandemic on chronic diseases care  
300 follow-up and current perspectives in low resource settings: a narrative review. *Int J Physiol*  
301 *Pathophysiol Pharmacol*. 2021;13(3):86-93.
- 302 6. Danhieux K, Buffel V, Pairon A, et al. The impact of COVID-19 on chronic care according to  
303 providers: a qualitative study among primary care practices in Belgium. *BMC Family Practice*.  
304 2020;21(1):255. doi:10.1186/s12875-020-01326-3
- 305 7. Zheng Z, Peng F, Xu B, et al. Risk factors of critical & mortal COVID-19 cases: A systematic  
306 literature review and meta-analysis. *Journal of Infection*. 2020;81(2):e16-e25.  
307 doi:10.1016/j.jinf.2020.04.021
- 308 8. Nilsson SF, Laursen TM, Osler M, et al. Adverse SARS-CoV-2-associated outcomes among people  
309 experiencing social marginalisation and psychiatric vulnerability: A population-based cohort  
310 study among 4,4 million people. *The Lancet Regional Health - Europe*. 2022;20:100421.  
311 doi:10.1016/j.lanepe.2022.100421
- 312 9. McQueenie R, Foster HME, Jani BD, et al. Multimorbidity, polypharmacy, and COVID-19 infection  
313 within the UK Biobank cohort. *PLOS ONE*. 2020;15(8):e0238091.  
314 doi:10.1371/journal.pone.0238091
- 315 10. Heald AH, Jenkins DA, Williams R, et al. The Risk Factors Potentially Influencing Hospital  
316 Admission in People with Diabetes, Following SARS-CoV-2 Infection: A Population-Level Analysis.  
317 *Diabetes Ther*. 2022;13(5):1007-1021. doi:10.1007/s13300-022-01230-2
- 318 11. Heald AH, Jenkins DA, Williams R, et al. Mortality in People with Type 2 Diabetes Following  
319 SARS-CoV-2 Infection: A Population Level Analysis of Potential Risk Factors. *Diabetes Ther*.  
320 2022;13(5):1037-1051. doi:10.1007/s13300-022-01259-3



- 321 12. Masnoon N, Shakib S, Kalisch-Ellett L, Caughey GE. What is polypharmacy? A systematic review  
322 of definitions. *BMC Geriatr.* 2017;17(1):230. doi:10.1186/s12877-017-0621-2
- 323 13. Remelli F, Ceresini MG, Trevisan C, Noale M, Volpato S. Prevalence and impact of polypharmacy  
324 in older patients with type 2 diabetes. *Aging Clin Exp Res.* 2022;34(9):1969-1983.  
325 doi:10.1007/s40520-022-02165-1
- 326 14. Rochon PA, Petrovic M, Cherubini A, et al. Polypharmacy, inappropriate prescribing, and  
327 deprescribing in older people: through a sex and gender lens. *The Lancet Healthy Longevity.*  
328 2021;2(5):e290-e300. doi:10.1016/S2666-7568(21)00054-4
- 329 15. Bhagavathula AS, Vidyasagar K, Chhabra M, et al. Prevalence of Polypharmacy,  
330 Hyperpolypharmacy and Potentially Inappropriate Medication Use in Older Adults in India: A  
331 Systematic Review and Meta-Analysis. *Frontiers in Pharmacology.* 2021;12. Accessed August 11,  
332 2023. <https://www.frontiersin.org/articles/10.3389/fphar.2021.685518>
- 333 16. McKeigue PM, Kennedy S, Weir A, et al. Relation of severe COVID-19 to polypharmacy and  
334 prescribing of psychotropic drugs: the REACT-SCOT case-control study. *BMC Medicine.*  
335 2021;19(1):51. doi:10.1186/s12916-021-01907-8
- 336 17. Iloanusi S, Mgbere O, Essien EJ. Polypharmacy among COVID-19 patients: A systematic review. *J*  
337 *Am Pharm Assoc (2003).* 2021;61(5):e14-e25. doi:10.1016/j.japh.2021.05.006
- 338 18. Rahman S, Singh K, Dhingra S, et al. The Double Burden of the COVID-19 Pandemic and  
339 Polypharmacy on Geriatric Population – Public Health Implications. *Ther Clin Risk Manag.*  
340 2020;16:1007-1022. doi:10.2147/TCRM.S272908
- 341 19. Madhavan S, Bastarache L, Brown JS, et al. Use of electronic health records to support a public  
342 health response to the COVID-19 pandemic in the United States: a perspective from 15  
343 academic medical centers. *J Am Med Inform Assoc.* 2021;28(2):393-401.  
344 doi:10.1093/jamia/ocaa287
- 345 20. Casey JA, Schwartz BS, Stewart WF, Adler NE. Using Electronic Health Records for Population  
346 Health Research: A Review of Methods and Applications. *Annual Review of Public Health.*  
347 2016;37(1):61-81. doi:10.1146/annurev-publhealth-032315-021353
- 348 21. Kruse CS, Stein A, Thomas H, Kaur H. The use of Electronic Health Records to Support Population  
349 Health: A Systematic Review of the Literature. *J Med Syst.* 2018;42(11):214.  
350 doi:10.1007/s10916-018-1075-6
- 351 22. Cowie MR, Blomster JI, Curtis LH, et al. Electronic health records to facilitate clinical research.  
352 *Clin Res Cardiol.* 2017;106(1):1-9. doi:10.1007/s00392-016-1025-6
- 353 23. Langan SM, Schmidt SA, Wing K, et al. The reporting of studies conducted using observational  
354 routinely collected health data statement for pharmacoepidemiology (RECORD-PE). *BMJ.*  
355 Published online November 14, 2018:k3532. doi:10.1136/bmj.k3532
- 356 24. Rahman S, Singh K, Dhingra S, et al. The Double Burden of the COVID-19 Pandemic and  
357 Polypharmacy on Geriatric Population – Public Health Implications. *Ther Clin Risk Manag.*  
358 2020;16:1007-1022. doi:10.2147/TCRM.S272908
- 359 25. Kerr L. Polypharmacy in diabetes and solutions for greater adherence. *Practical Diabetes*  
360 *International.* 2009;26(7):289-290. doi:10.1002/pdi.1402

- 361 26. The AHSN Network. Polypharmacy. The AHSN Network. Published 2022. Accessed April 7, 2023.  
362 <https://www.ahsnnetwork.com/programmes/medicines/polypharmacy/>
- 363 27. Department of Health and Social Care. National overprescribing review report. GOV.UK.  
364 Published 2023. Accessed April 7, 2023. [https://www.gov.uk/government/publications/national-](https://www.gov.uk/government/publications/national-overprescribing-review-report)  
365 [overprescribing-review-report](https://www.gov.uk/government/publications/national-overprescribing-review-report)
- 366 28. Hanlon P, Nicholl BI, Jani BD, Lee D, McQueenie R, Mair FS. Frailty and pre-frailty in middle-aged  
367 and older adults and its association with multimorbidity and mortality: a prospective analysis of  
368 493 737 UK Biobank participants. *The Lancet Public Health*. 2018;3(7):e323-e332.  
369 doi:10.1016/S2468-2667(18)30091-4
- 370 29. Marzec LN, Maddox TM. Medication Adherence in Patients with Diabetes and Dyslipidemia:  
371 Associated Factors and Strategies for Improvement. *Curr Cardiol Rep*. 2013;15(11):418.  
372 doi:10.1007/s11886-013-0418-7
- 373 30. Carayon P, Du S, Brown R, Cartmill R, Johnson M, Wetterneck TB. EHR-related medication errors  
374 in two ICUs. *J Healthc Risk Manag*. 2017;36(3):6-15. doi:10.1002/jhrm.21259
- 375
